# Supplementary material for: Amelioration of Alzheimer’s disease pathology and cognitive deficits by immunomodulatory agents in animal models of Alzheimer’s disease
Source: PubMed Central journal article supplement — Neural Regen Res. 2019 Jul;14(7):1158–76. doi: 10.4103/1673-5374.251192 (PMC6425849; doi:10.4103/1673-5374.251192), 2019-07
Supplement: NRR-14-1158_Suppl1.pdf [file NRR-14-1158_Suppl1.pdf]

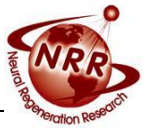**OPEN PEER REVIEW REPORT 1**

**Name of journal:** Neural Regeneration Research

**Manuscript NO:** NRR-D-18-00763

**Title:** Amelioration of Alzheimer's disease pathology and cognitive deficits by immunomodulatory agents in animal models of Alzheimer's disease

**Reviewer's Name:** Hans-Gert Bernstein

**Reviewer's country:** Germany

**Date sent for review:** 2019-01-01

**Date reviewed:** 2019-01-02

**Review time:** 1 day

**COMMENTS TO AUTHORS**

This is a well-written, very comprehensive review dealing with an important aspect of current Alzheimer research. I found it very inspiring to read how mouse and rat AD models were compared .  
Minor point:

Some sentences contained in the summary are literally repeated in the introductory remarks. Therefore I suggest to re-phrase a bit either the summary or the introduction.
